# Supplementary material
Source: PubMed Central journal article supplement (PMC4323370)
Supplement: ijbsv11p0304s1.pdf [file ijbsv11p0304s1.pdf]

## SUPPLEMENTAL MATERIALS

### Supplemental Tables

**TABLE S1** Oligonucleotide primers used in this study.

| Primers                     | Sequences                                            |
|-----------------------------|------------------------------------------------------|
| Common primers <sup>a</sup> |                                                      |
| Chi-F                       | 5'–AGAGATCTGATTCACCAAAGCAAAGTCAAAAATT–3' (Forward)   |
| Chi-R                       | 5'–CAGCTGCAGCTAGTTTTTCGCTAATGACGGCATTAA–3' (Reverse) |
| Specific primers            |                                                      |
| Y46A-F                      | 5'–TCAAAAATTGTTGGGGCCTTTCCTTCGTGGGGCGT–3' (Forward)  |
| Y46A-R                      | 5'–TACCCAACAATTTTTGACTTTGCTTTGGTGAATCT–3' (Reverse)  |
| W50A-F                      | 5'–TGGGTACTTTCCTTCGGCGGGCGTTTACGGACGTAA–3' (Forward) |
| W50A-R                      | 5'–GCCGAAGGAAAGTACCCAACAATTTTTGACTTTGC–3' (Reverse)  |
| R55A-F                      | 5'–GGGGCGTTTACGGAGCTAATTATCAAGTTGCTGACA–3' (Forward) |
| R55A-R                      | 5'–GCTCCGTAAACGCCCCACGAAGGAAAGTACCCAACA–3' (Reverse) |
| W171A-F                     | 5'–TATTTCCGTTGGTGGCGCGACTTGGTCTAACCGCTT–3' (Forward) |
| W171A-R                     | 5'–GCGCCACCAACGGAAATAATTGTTTTTAAGTGAGGA–3' (Reverse) |
| E211A-F                     | 5'–TAGATTTAGACTGGGCATATCCGGGCGTTGAAACGA–3' (Forward) |
| E211A-R                     | 5'–GCCCAGTCTAAATCTACGCCATCAAACCCATATGCG–3' (Reverse) |
| D287A-F                     | 5'–TAGTATTATGACATATGCTTTCACGGCGGATGGGA–3' (Forward)  |
| D287A-R                     | 5'–GCATATGTCATAATACTAATCCAATCGAGTATTTGA–3' (Reverse) |
| R343A-F                     | 5'–CGTACCCTTTTACGGAGCTGGCTGGAAAAGTTGTGG–3' (Forward) |
| R343A-R                     | 5'–GCTCCGTAAAAGGGTACGCCTAATACTAGTTTATCG–3' (Reverse) |
| D385A-F                     | 5'–TGACACAGGTGTCTATGCTTACGGTGATTTAGCAGC–3' (Forward) |

D385A-R 5'-GCATAGACACCTGTGTCACCGGTAGAGTAATCATCC-3' (Reverse)

W447A-F 5'-AAGTGGAGCAATGTTTGC GGAACTAAGCGGAGATTG-3' (Forward)

W447A-R 5'-GCAAACATTGCTCCACTTAAACCTTTCGTCTTTATA-3' (Reverse)

S450A-F 5'-AATGTTTTGGGAACTAGCCGGAGATTGCCGTACAAG-3' (Forward)

S450A-R 5'-GCTAGTTC CCAAACATTGCTCCACTTAAACCTTTC-3' (Reverse)

---

<sup>a</sup> The underlined sequences indicates the restriction enzymes *Bgl*III (AGATCT) and *Pst*I (CTGCAG) sites.

**TABLE S2** Partial homologous proteins to Chi9602<sub>35-459</sub> by BLASTP search from PDB.

| No. | PDB ID | GenBank Accession | Sources                                    | Identity |
|-----|--------|-------------------|--------------------------------------------|----------|
| 0   | –      | KF671757.1        | <i>Bacillus thuringiensis</i> Chi9602      | 100%     |
| 1   | 1ITX   | 20150306          | <i>Bacillus circulans</i> chitinase A1     | 61%      |
| 2   | 4PTM   | 605604531         | <i>Serratia proteamaculans</i> chitinase D | 35%      |
| 3   | 1FFQ   | 28948336          | <i>Serratia marcescens</i>                 | 34%      |
| 4   | 3G6L   | 288965415         | <i>Clonostachys rosea</i> chitinase Crchi1 | 33%      |
| 5   | 3ARO   | 329665965         | <i>Vibrio harveyi</i> chitinase A          | 33%      |
| 6   | 1HKM   | 47168339          | <i>Homo sapiens</i> chitinase              | 32%      |
| 7   | 1LL4   | 24158867          | <i>Coccidioides immitis</i> chitinase 1    | 31%      |
| 8   | 3CH9   | 170785246         | <i>Aspergillus fumigatus</i> chitinase B1  | 31%      |
| 9   | 3W4R   | 584579550         | <i>Ostrinia furnacalis</i> chitinase       | 30%      |
| 10  | 4DWS   | GI:453055980      | <i>Yersinia entomophaga</i> chitinase 1    | 28%      |

## Supplemental Figure Captions

**FIG S1** Schematic illustration of recombinant plasmid construction and the amino acid sites of the Chi9602 variants subjected to site-directed mutagenesis.

**FIG S2. Alignment analysis of partial amino acid sequences of Chi9602 and several family 18 chitinases.** The blue rectangular frames indicate the specific chitinase-binding motif “SXGG” and the conserved CCD motif “DXDXE” of the family 18 chitinases. The red triangles indicate the amino acid sites that were selected for mutagenesis in this study.

**FIG S3** Evaluation of the structural coordinates of the constructed Chi9602<sub>35-457</sub> model by Ramachandran plot analysis. A, Overall view of Ramachandran plot results for the Chi9602<sub>35-459</sub> model; B, Detailed Ramachandran plot analyses revealing the coordination of the residues in favored or allowed regions.

**FIG S4** Ribbon model of the Chi9602<sub>35-459</sub> + (NAG)<sub>2</sub> complex (A) and an expanded view of this model showing the surrounding residues of the substrate binding groove (B). In B, the red-colored residues represent the residues selected for site-directed mutagenesis. AA, amino acid.

**FIG S5** SDS-PAGE profiles of wild-type Chi9602 and the mutant chitinases. A, Lane 1, protein MW marker; lane 2, *E. coli* TOP10 (negative control); lane 3, *E. coli* MB332 expressing the *chi* gene; lane 4, purified Chi9602 from MB332. B, Purified mutant chitinases. Lanes 1 to 10, protein MW marker, ChiY46A, ChiW50A, ChiR55A, ChiW171A, ChiE211A, ChiD287A, ChiR343A, ChiD385A, Chi9602

(control), respectively. C, Purified mutant chitinases (continued). Lanes 1 to 4, protein MW marker, ChiW447A, ChiS450A, Chi9602 (control), respectively.

## SUPPLEMENTARY FIGURES

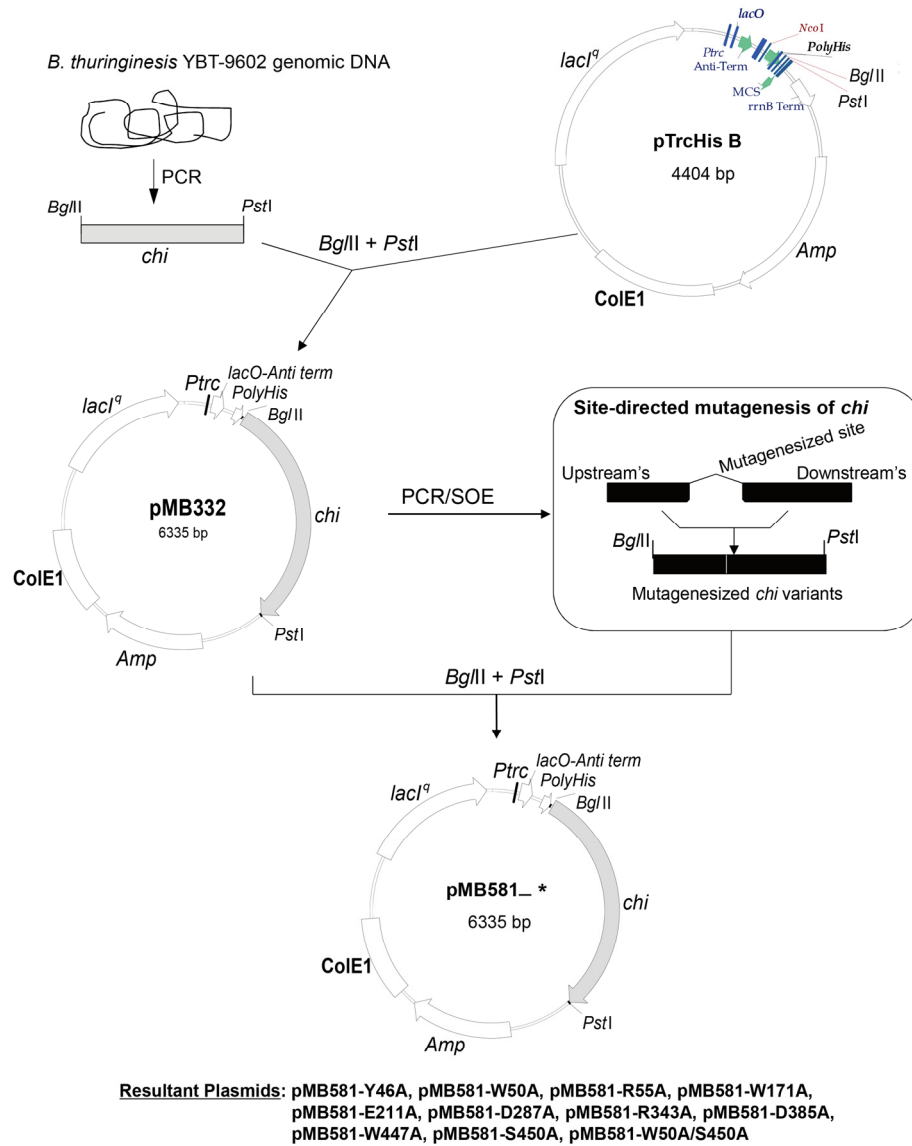

**FIG S1** Schematic illustration of recombinant plasmid construction and the amino acid sites of the Chi9602 variants subjected to site-directed mutagenesis.

|           |              |             |             |             |              |               |                |            |         |         |           |     |      |     |
|-----------|--------------|-------------|-------------|-------------|--------------|---------------|----------------|------------|---------|---------|-----------|-----|------|-----|
|           | 10           | 20          | 30          | 40          | 50           | 60            |                |            |         |         |           |     |      |     |
| Consensus | ..... .....  | ..... ..... | ..... ..... | ..... ..... | ..... .....  | ..... .....   |                |            |         |         |           |     |      |     |
| Chi9602   | MAMRSQKFTL   | LLLSLLLFLP  | LFLT NFITPN | LALADSPKQS  | QKIVGYFPSW   | G--VYGRN-Y    | 57             |            |         |         |           |     |      |     |
| 1ITX      | -----        | -----       | -----LQP-   | -ATAEAAD-S  | YKIVGYFPPSW  | A--AYGRN-Y    | 28             |            |         |         |           |     |      |     |
| 4PTM      | -----        | -----       | -----       | -----AHAAS  | YLSVGYFNGG   | GDVTAGPG-G    | 24             |            |         |         |           |     |      |     |
| 1FFQ      | DGCTASDATE   | IVVADTDGSH  | LAPLKEPLLE  | KNKPYKQNSG  | KVVGSYFVEW   | G--VYGRN-F    | 57             |            |         |         |           |     |      |     |
| 3G6L      | -----        | -----R      | ATPRMEDLAS  | TDLSTRATGS  | IN-AVYFTNW   | G--IYGRN-F    | 37             |            |         |         |           |     |      |     |
| 3ARO      | TGCSKSAPE    | ITIAADTDGSH | LKPLTMNVDP  | NNKSYNTDPS  | I VMGYFVVEW  | G--IYGRD-Y    | 57             |            |         |         |           |     |      |     |
| 1HKM      | -----        | -----       | -----       | -----       | AKLVCYFTNW   | AQYRQGEARF    | 20             |            |         |         |           |     |      |     |
| 1LL4      | -----        | -----       | -----       | -----GG     | FRSVVYFVNW   | A--IYGRG-H    | 19             |            |         |         |           |     |      |     |
| 3CH9      | FATSTIVKVA   | LLSSSLCVD   | AVMWRDTS    | TDLEARASSG  | YRSVVYFVNW   | A--IYGRN-H    | 57             |            |         |         |           |     |      |     |
| 3W4R      | -----        | -----MRA    | LTTLAVLAV   | GINAAESDSR  | ARVVCYFSNW   | AVYRPGVGRY    | 44             |            |         |         |           |     |      |     |
| 4DWS      | ETYSRPDVNF   | KEDGSQGNLS  | YTATRVCA    | PMYNHVYGD   | KTKPKLSAYITD | WCQYDARLDGG   | 60             |            |         |         |           |     |      |     |
|           | 70           | 80          | 90          | 100         | 110          | 120           |                |            |         |         |           |     |      |     |
| Consensus | ..... .....  | ..... ..... | ..... ..... | ..... ..... | ..... .....  | ..... .....   |                |            |         |         |           |     |      |     |
| Chi9602   | QVAD-----    | -----IDA    | SKLTHLN     | YAFAD       | CWNGKHG      | -----NPS      | THPDNPNKQT     | 97         |         |         |           |     |      |     |
| 1ITX      | NVAD-----    | -----IDP    | TKVTHIN     | YAFAD       | CWNGIHG      | -----NP-      | -DPSGPNPVT     | 66         |         |         |           |     |      |     |
| 4PTM      | DINK-----    | -----LDV    | TQITHLN     | YSFGL       | IYND         | -----         | -----EKQET     | 52         |         |         |           |     |      |     |
| 1FFQ      | TVDK-----    | -----IPA    | QNLTHL      | LYGFIP      | CGNGIN       | -----DSLKEIEG | -SFQALQRS      | 101        |         |         |           |     |      |     |
| 3G6L      | QPAD-----    | -----LQA    | SKILHV      | LYSFMN      | LRVD         | -----         | -----          | 60         |         |         |           |     |      |     |
| 3ARO      | TVDN-----    | -----MPV    | DNLTHI      | LYGFIP      | CGPN         | -----ESVKS    | SVGGNSFNALQ    | 99         |         |         |           |     |      |     |
| 1HKM      | LPKD-----    | -----LDP    | SLCTHL      | LYAFAG      | M TNHQ       | -----         | -----          | 44         |         |         |           |     |      |     |
| 1LL4      | NPQD-----    | -----LKA    | DQFTHI      | LYAFAN      | RP           | SG            | -----          | 43         |         |         |           |     |      |     |
| 3CH9      | NPQD-----    | -----LKV    | ERLTHV      | LYAFAN      | RP           | ET            | -----          | 81         |         |         |           |     |      |     |
| 3W4R      | GIED-----    | -----IPV    | DMCTHI      | LYSFI       | GV           | TED           | -----          | 68         |         |         |           |     |      |     |
| 4DWS      | GSKEEERGRG   | FDLATLMQNP  | ATYDRLI     | IFSE        | LGICG        | DIGNK         | SKKVQEVWDG     | WNAQAPSLGL | 120     |         |           |     |      |     |
|           | 130          | 140         | 150         | 160         | 170          | 180           |                |            |         |         |           |     |      |     |
| Consensus | ..... .....  | ..... ..... | ..... ..... | ..... ..... | ..... .....  | ..... .....   |                |            |         |         |           |     |      |     |
| Chi9602   | WNCKESGVPL   | QNKEVPNGTL  | VLGEPWADVT  | KSYPGSGTTW  | E-----DCDK   | YARCGNFGEL    | 152            |            |         |         |           |     |      |     |
| 1ITX      | WTCQNEKS--   | QTINVPNGTI  | VLGDPWIDTG  | KT FAG--DTW | D-----Q---   | -PIAGNINQL    | 113            |            |         |         |           |     |      |     |
| 4PTM      | NPALKDPSRL   | HQIYLSP--   | -----       | -----       | -----        | -KVMADLQLL    | 78             |            |         |         |           |     |      |     |
| 1FFQ      | QGREDFKVS    | IHDPPAALQKA | QK--GVTAWD  | D-----      | -----        | -PYKGNFGQL    | 139            |            |         |         |           |     |      |     |
| 3G6L      | -----GTVYS   | GDTYADLEKH  | YSDDSWNDIG  | T-----      | -----        | -NAYGCVKQL    | 95             |            |         |         |           |     |      |     |
| 3ARO      | RGVNDYEVVI   | HDPWAA YQKS | FP-QAGHEYS  | T-----      | -----        | -PIKGNYAML    | 138            |            |         |         |           |     |      |     |
| 1HKM      | -----L       | STTEWN--    | -----       | -----       | -----        | -DETLYQEFN    | 60             |            |         |         |           |     |      |     |
| 1LL4      | -----EYVL    | SDTWADTDKH  | YPGDKWDEPG  | N-----      | -----        | -NVYGCIKQM    | 77             |            |         |         |           |     |      |     |
| 3CH9      | -----GEVYM   | TDSWADIEKH  | YPGDSWSDTG  | N-----      | -----        | -NVYGCIKQL    | 116            |            |         |         |           |     |      |     |
| 3W4R      | -----QQVLI   | IDPELVD--   | -----       | -----       | -----        | -DKNGFKNFT    | 89             |            |         |         |           |     |      |     |
| 4DWS      | PQIGKGHIVP   | LDPYGD LGTA | RNVGLPPE    | SA DTSIESG  | TFLPYYQ----- | Q NRAAGLLGLL  | 175            |            |         |         |           |     |      |     |
|           | 190          | 200         | 210         | 220         | 230          | 240           |                |            |         |         |           |     |      |     |
| Consensus | ..... .....  | ..... ..... | ..... ..... | ..... ..... | ..... .....  | ..... .....   |                |            |         |         |           |     |      |     |
| Chi9602   | KRLKAKY---   | -PHLKTII    | SVGGWT      | -WSNRF      | SDMAADEKTR   | KVFAESTVAF    | LRAYG-FDGV     | 206        |         |         |           |     |      |     |
| 1ITX      | NKLLKQTN---  | -PNLKTII    | SVGGWT      | -WSNRF      | SDVAATAATR   | EVFAANS       | AVDFLRKYH-FDGV | 167        |         |         |           |     |      |     |
| 4PTM      | PVLRKQKQ---  | -PELKVLL    | SVGGWG      | -ARG-F      | SGAAATAESR   | AVFIRSVQVQ    | IQQYH-LDGI     | 131        |         |         |           |     |      |     |
| 1FFQ      | MALKKQAH---  | -PDLKILPS   | I GGWT      | -LSDPF      | FFMGDK-VKR   | DRFVGSVKEF    | LQTKWFFDGV     | 193        |         |         |           |     |      |     |
| 3G6L      | YKLLKKAN---  | -RSLKIMLS   | I GGWT      | -LSDPF      | PAAASTAATR   | ATFAKTAVEF    | MKDWG-FDGI     | 149        |         |         |           |     |      |     |
| 3ARO      | MALKKQRN---  | -PDLKIIPS   | I GGWT      | -LSDPF      | YDFVDK-KNR   | DTFVASVKKF    | LKTWKFYDGI     | 192        |         |         |           |     |      |     |
| 1HKM      | -GLKKMN---   | -PKLKTLL    | AI GGWN     | NFGTQKF     | TDMVATANNR   | QTFVNSAIRF    | LRKYS-FDGI     | 114        |         |         |           |     |      |     |
| 1LL4      | YLLKKQNN---  | -RNLKTLL    | SI GGWT     | -YSPNF      | KTPASTEGR    | KKFADTSLKL    | MKDLG-FDGI     | 131        |         |         |           |     |      |     |
| 3CH9      | YLLKKQNN---  | -RNLKVL     | SI GGWT     | -YSPNF      | APAASTDAGR   | KNFAKTAVKL    | LQDLG-FDGI     | 170        |         |         |           |     |      |     |
| 3W4R      | -SLRSKH---   | -PGVKFTV    | AV GGWA     | EGGSKY      | SKMVAAKSTR   | MAFVRSVVDF    | LNKYN-FDGI     | 143        |         |         |           |     |      |     |
| 4DWS      | RELQKKAHAM   | GHLDLA      | FSI GGWS    | -LSSYF      | SALAE NPDER  | RVFVASVVDF    | FVRFPMFSCV     | 234        |         |         |           |     |      |     |
|           | 250          | 260         | 270         | 280         | 290          | 300           |                |            |         |         |           |     |      |     |
| Consensus | *: * * * * * | ..... ..... | ..... ..... | ..... ..... | ..... .....  | ..... .....   |                |            |         |         |           |     |      |     |
| Chi9602   | DL DWEYYP    | GVETIP      | GGSYRPE     | -DKQNF      | TL L QDVR    | NALNKA        | GAED--GKQY     | LLTIA      | SGASQ   | 263     |           |     |      |     |
| 1ITX      | DL DWEYYP    | VSGLD       | GN SKRPE    | -DKQNY      | TL L SKI     | REKLDA        | GAVD--GKKY     | LLTIA      | SGASA   | 224     |           |     |      |     |
| 4PTM      | DL DWEYYP    | VNGAW       | GLVESQPA    | -DRANF      | TL L AEL     | HKALDKG       | -----K         | LLTIA      | AVGANV  | 181     |           |     |      |     |
| 1FFQ      | DL DWEYYP    | GGKGAN      | PNLGSPPQ    | -DGETY      | VL L K       | REL RAMLDQL   | SVET--GRKY     | ELTSA      | ISAGK   | 250     |           |     |      |     |
| 3G6L      | DV DWEYYP    | ASETD       | ANN--       | -----       | MV L L       | QVRVQELDSY    | SATYANGYHF     | QLSIA      | APAGP   | 199     |           |     |      |     |
| 3ARO      | DI DWEYYP    | GGGGA       | ADKGD       | PVNDGP      | YIALM        | REL RVMLDEL   | EAET--GRTY     | ELTSA      | IGVGY   | 250     |           |     |      |     |
| 1HKM      | DL DWEYYP    | -G S        | QSPAV--     | -DKER       | F T L M      | QDLANA        | FQEEAQT        | S-GKERL    | LLSA    | AVPAGQ  | 167       |     |      |     |
| 1LL4      | DI DWEYYP    | PEDEK       | QAND--      | -----       | FV L L       | KACREALD      | YSAKHP         | NGK        | LLTIA   | SPAGP   | 181       |     |      |     |
| 3CH9      | DI DWEYYP    | ENDQ        | QAND--      | -----       | FV L L       | KEVRTAL       | SDYSAA         | NA         | GGQHF   | LLTVA   | SPAGP     | 220 |      |     |
| 3W4R      | DL DWEYYP    | GAA DR      | GSFS--      | -DKDK       | F L Y L V    | QELRR         | AFIRE          | GKG--      | -----   | W ELTAA | VPLAN     | 193 |      |     |
| 4DWS      | DI DWEYYP    | GGG G       | DEGNI       | SSDK        | -DG          | ENYV          | LLI KEL        | RSAL       | DSRFGYS | -----   | NRK ELISA | C   | SGVK | 290 |

(To be continued)

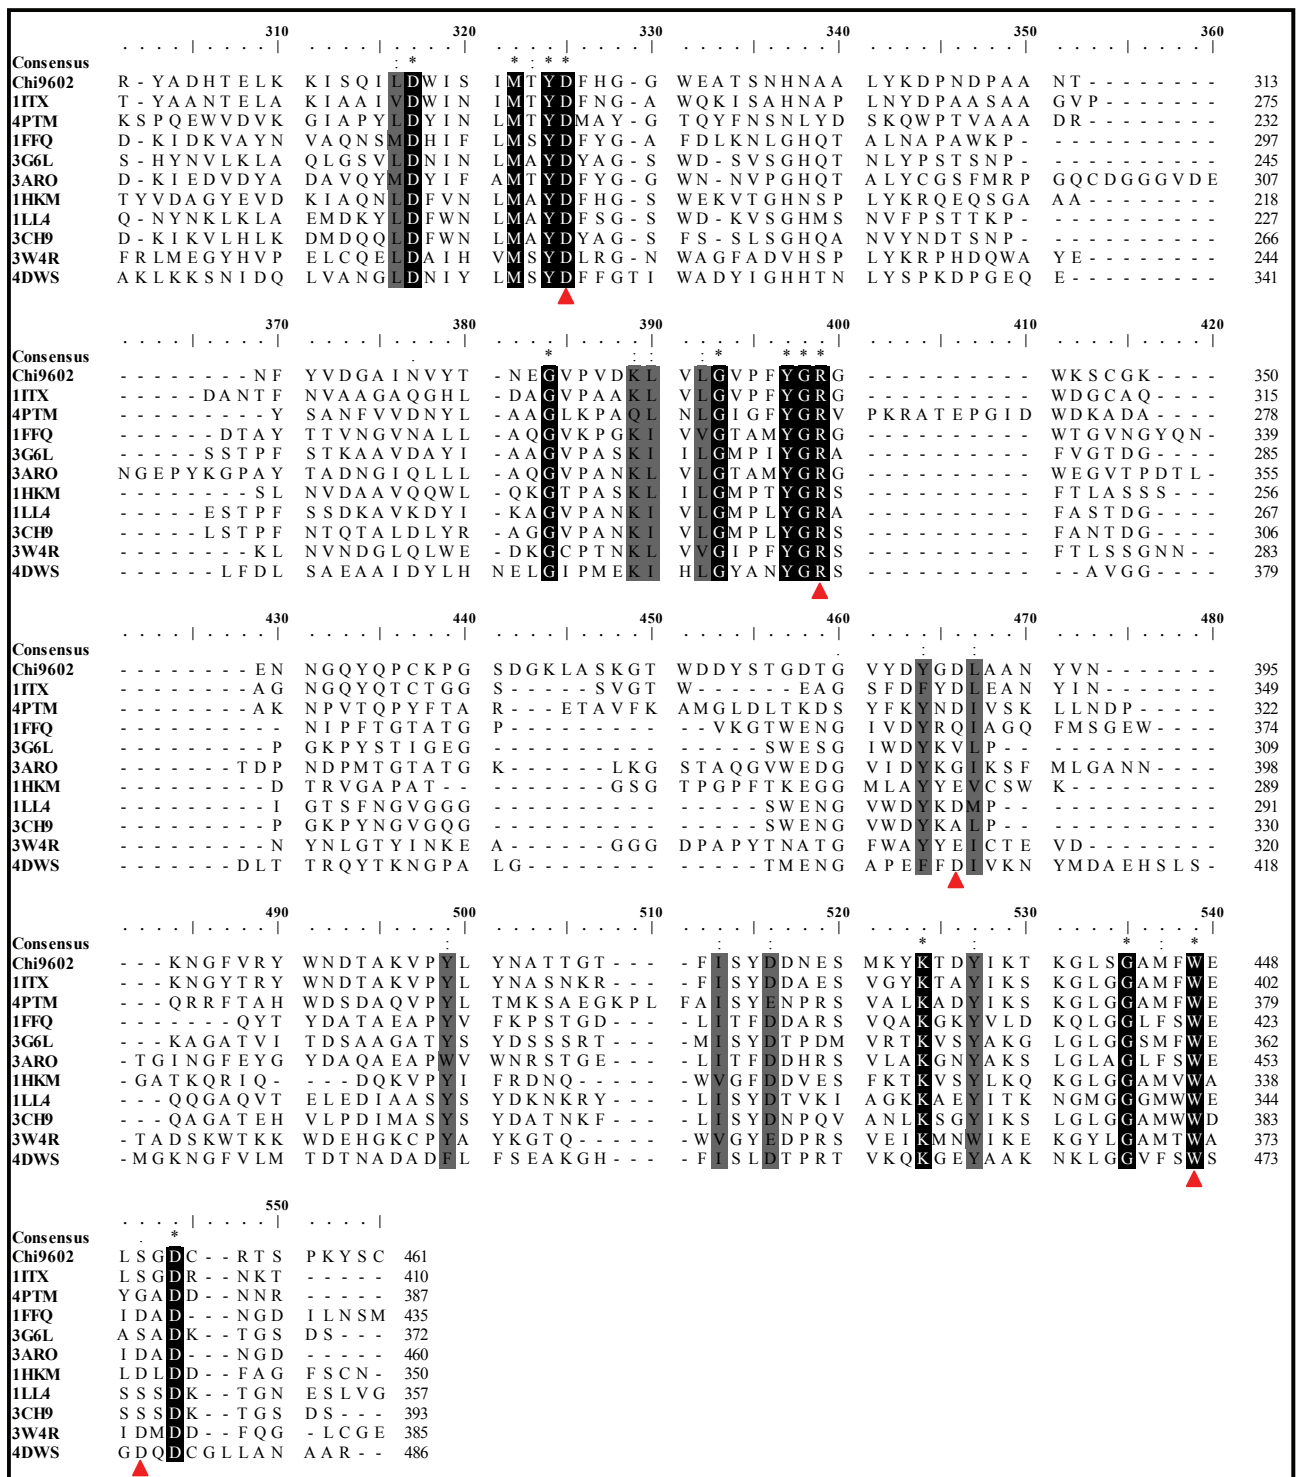

**FIG S2. Alignment analysis of partial amino acid sequences of Chi9602 and several family 18 chitinases.** The blue rectangular frames indicate the specific chitinase-binding motif “SXGG” and the conserved CCD motif “DXDXE” of the family 18 chitinases. The red triangles indicate the amino acid sites that were selected for mutagenesis in this study.



|                  |                               |                                                                               |        |                                                       |
|------------------|-------------------------------|-------------------------------------------------------------------------------|--------|-------------------------------------------------------|
| <b>A</b>         | All-Atom Contacts             | Clashscore, all atoms:                                                        | 74.41  | 0 <sup>th</sup> percentile* (N=1784, all resolutions) |
|                  |                               | Clashscore is the number of serious steric overlaps (> 0.4 Å) per 1000 atoms. |        |                                                       |
| Protein Geometry | Poor rotamers                 | 6                                                                             | 1.57%  | Goal: <1%                                             |
|                  | Ramachandran outliers         | 11                                                                            | 2.41%  | Goal: <0.05%                                          |
|                  | Ramachandran favored          | 426                                                                           | 93.42% | Goal: >98%                                            |
|                  | MolProbity score <sup>^</sup> | 2.92                                                                          |        | 26 <sup>th</sup> percentile* (N=27675, 0Å - 99Å)      |
|                  | Cβ deviations >0.25Å          | 5                                                                             | 1.20%  | Goal: 0                                               |
|                  | Bad backbone bonds:           | 3 / 3721                                                                      | 0.08%  | Goal: 0%                                              |
|                  | Bad backbone angles:          | 70 / 5058                                                                     | 1.38%  | Goal: <0.1%                                           |

In the two column results, the left column gives the raw count, right column gives the percentage.

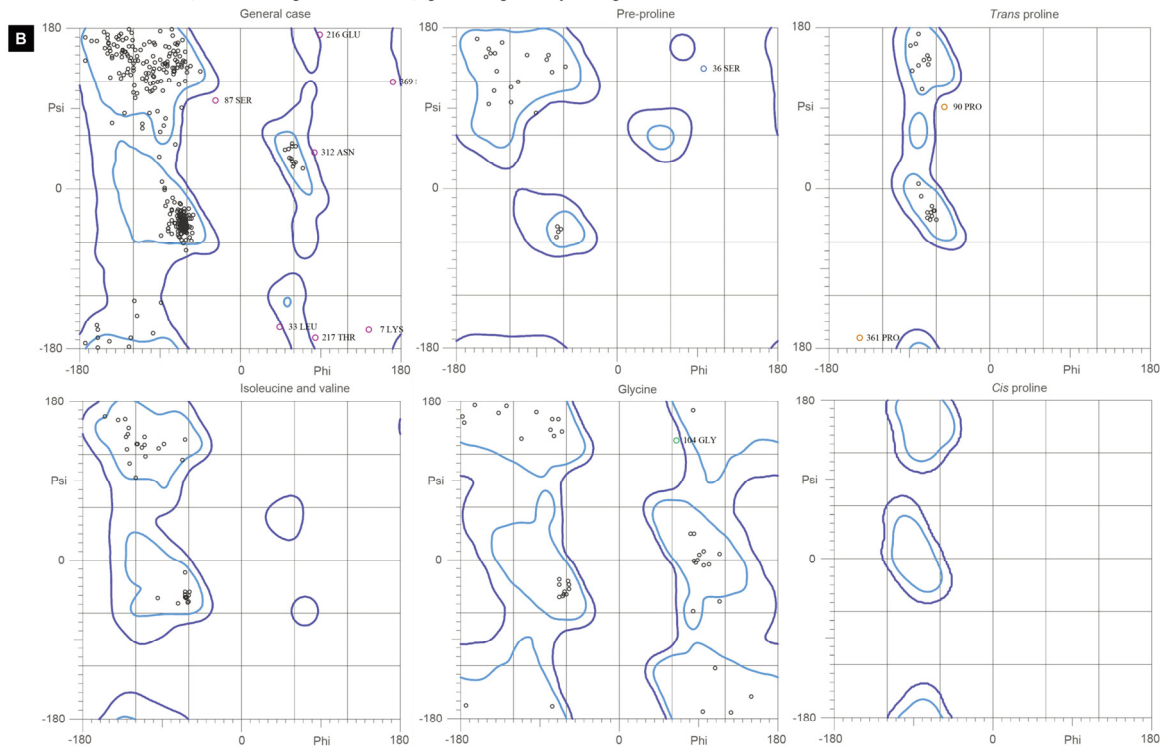

**Ramachandran results:**

93.4% (426/456) of all residues were in favored regions.

97.6% (445/456) of all residues were in allowed regions.

**There were 8 outliers (phi, psi):**

7 Lys (144.4, -159.5); 33 Leu (44.7, -156.7); 36 Ser (98.0, 135.0); 87 Ser (-28.4, 99.5); 90 Pro (-51.6, 92.2); 104 Gly (65.4, 136.4); 216 Glu (89.7, 173.7); 217 Thr (84.3, -168.9); 312 Asn (83.1, 41.4); 361 Pro (-146.8, -168.3); 369 Ser (171.8, 120.1)

**FIG S3** Evaluation of the structural coordinates of the constructed Chi9602<sub>35-457</sub> model by Ramachandran plot analysis. A, Overall view of Ramachandran plot results for the Chi9602<sub>35-459</sub> model; B, Detailed Ramachandran plot analyses revealing the coordination of the residues in favored or allowed regions.

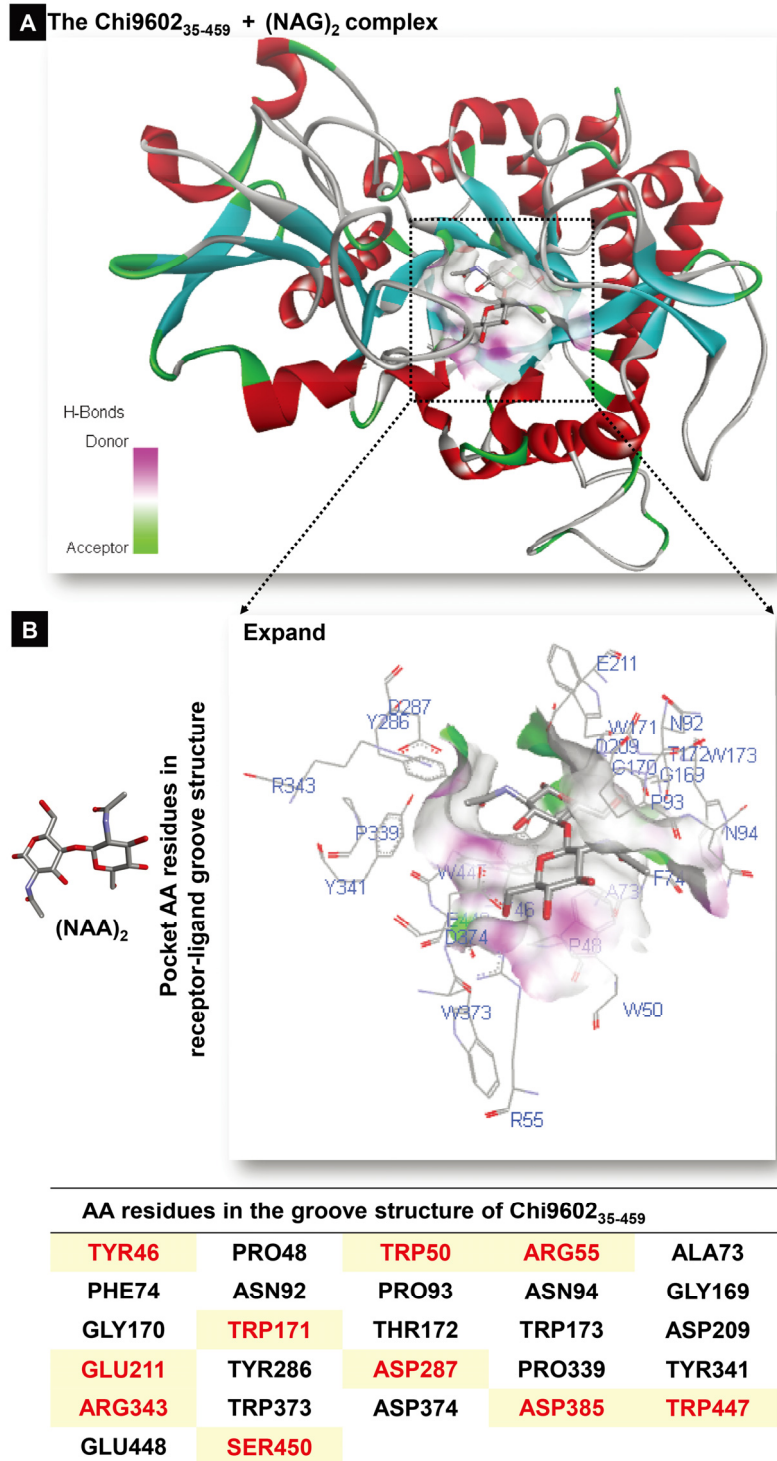

**FIG S4** Ribbon model of the Chi9602<sub>35-459</sub> + (NAG)<sub>2</sub> complex (A) and an expanded view of this model showing the surrounding residues of the substrate binding groove (B). In B, the red-colored residues represent the residues selected for site-directed mutagenesis. AA, amino acid.

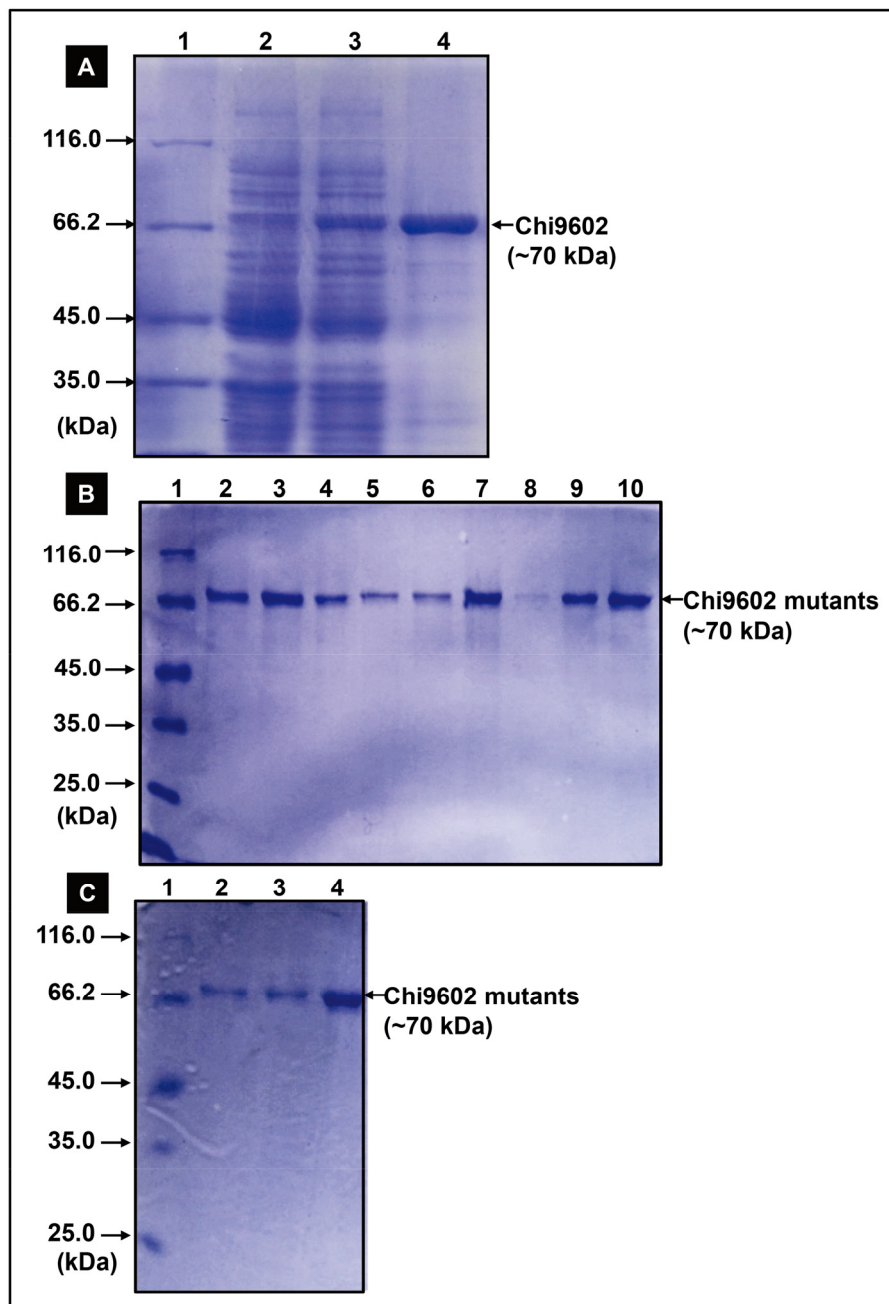

**FIG S5** SDS-PAGE profiles of wild-type Chi9602 and the mutant chitinases. A, Lane 1, protein MW marker; lane 2, *E. coli* TOP10 (negative control); lane 3, *E. coli* MB332 expressing the *chi* gene; lane 4, purified Chi9602 from MB332. B, Purified mutant chitinases. Lanes 1 to 10, protein MW marker, ChiY46A, ChiW50A, ChiR55A, ChiW171A, ChiE211A, ChiD287A, ChiR343A, ChiD385A, Chi9602 (control), respectively. C, Purified mutant chitinases (continued). Lanes 1 to 4, protein MW marker, ChiW447A, ChiS450A, Chi9602 (control), respectively.
